# Supplementary material for: Molecular Mechanisms of Pharmaceutical Drug Binding into Calsequestrin
Source: MDPI journal article supplement (doi:10.3390/ijms131114326), 2012-11-06
Supplement: s2 [file s2]

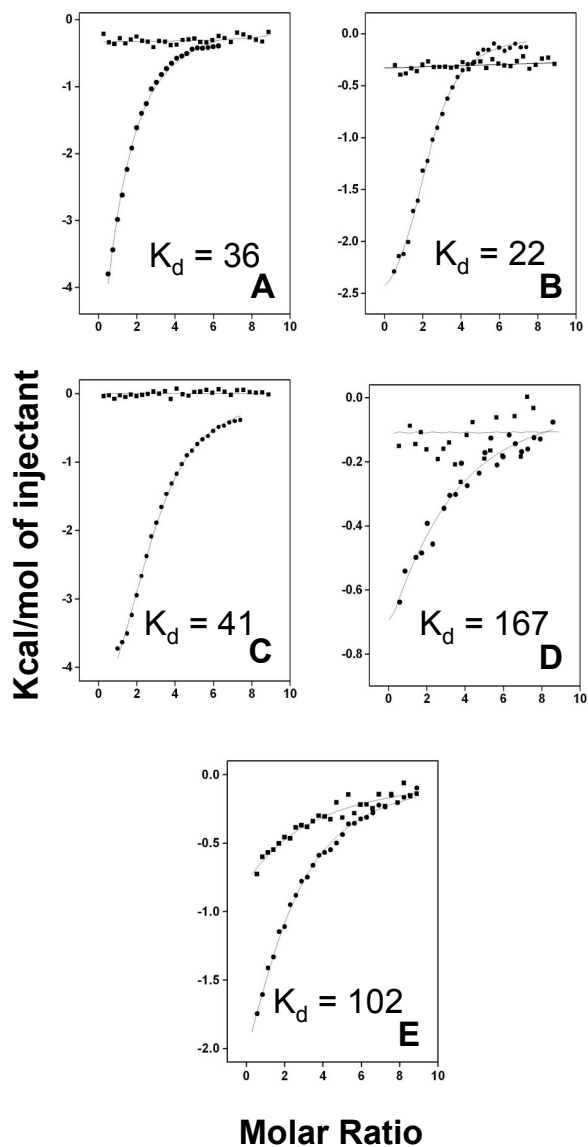

**Supplemental Fig. 2** Effect of caffeine on binding of various drugs by hCASQ2. Protein was titrated in the presence of a constant 5 mM concentration of caffeine. A) trifluoperazine, B) thioridazine, C) diltiazem, D) imipramine and E) chlorpromazine. Dissociation constants are for the titration in the absence of caffeine and is expressed as  $\mu\text{M}$ .
